# Supplementary material for: Sex Pheromones of C. elegans Males Prime the Female Reproductive System and Ameliorate the Effects of Heat Stress
Source: PLoS Genet. 2015 Dec 8;11(12):e1005729. doi: 10.1371/journal.pgen.1005729 (PMC4672928; doi:10.1371/journal.pgen.1005729)
Supplement: S1 Table — (XLSX) [file pgen.1005729.s013.xlsx]

## Sheet: Figure 1 and supplements
S1 Table. Summary of experiments and numbers of animals tested in this study (recovery of fecundity data).
	Expt. 1	Expt. 2	Expt. 3	Expt. 4	Expt. 5	Expt. 6	Expt. 7	Expt. 8	Expt. 9	Expt. 10	Expt. 11	Expt. 12	Expt. 13		# of trials	# of worms	# recovered	fraction recovered
	2014-02-11	2014-03-07	2014-03-13	2014-03-27	2014-06-04	2014-06-23	2014-07-18	2014-07-24	2014-07-31	2014-12-31	2015-01-09	2015-01-13	2015-02-17
Figure 1
Control	6/25	5/25	7/24								7/25				4	99	25	0.252525
Hermaphrodite + male	15/25			16/24		16/25									3	74	47	0.64
N2 male scent		16/25	13/25	9/22	13/24	11/25	12/25	14/25	14/25	15/25	15/25	13/25	15/25		12	296	160	0.54
N2 hermaphrodite scent									8/25	7/24					2	49	15	0.31
daf-22 male scent						8/25	5/24								2	49	13	0.27
acox-1 hermaphrodite scent									16/25	13/24					2	49	29	0.59
S2 Figure
Hermaphrodite, male stressed		10/23	15/24	8/23				11/25							4	95	44	0.46
separately and recovered
on hermaphrodite plates
Hermaphrodite, male stressed								12/24	11/23						2	47	23	0.489362
separately and recovered
on male plates
L3 scent					4/25			6/25							2	50	10	0.2
S3 Figure
Male scent only during stress						6/23									1	23	6	0.26087
Male scent only during recovery						7/25									1	25	7	0.28
S4 Figure
On plates scented by males for											3/24	6/25	7/24		3	73	16	0.219178
12 hours or less
On plates scented by males for											15/25	11/25	12/25		3	75	38	0.506667
more than 12 hours

## Sheet: Figure 2 and supplements
	Expt. 1	Expt. 2	Expt. 3	Expt. 4	Expt. 5	Expt. 6	Expt. 7	Expt. 8	Expt. 9	Expt. 10	Expt. 11	Expt. 12	Expt. 13	Expt. 14		# of trials	# of worms	# recovered	fraction recovered
	2014-11-07	2014-11-13	2014-11-24	2014-12-05	2014-12-12	2014-12-26	2015-01-02	2015-01-09	2015-01-13	2015-01-22	2015-01-26	2015-01-30	2015-02-02	2015-02-06
Figure 2
No ascaroside control	7/25	7/25	7/25	6/24	9/25	9/25	8/25	9/25	6/25		6/25			8/25		11	274	82	0.29927
ascr#10 10.0 fmol	7/25		8/24	6/25			9/25					8/25				5	124	38	0.306452
ascr#3 10.0 fmol	13/25		11/25	8/25			10/25					9/24	11/25, 8/25			7	174	70	0.402299
Male cocktail		15/25		11/25		17/25	14/25				13/25			13/25, 14/25		7	175	97	0.554286
Hermaphrodite		10/25		8/25		10/25	9/23				9/25		11/25	10/24, 10/25, 9/23		9	220	86	0.390909
coctail
S5 Figure
ascr#3 5.0 fmol +							10/25	7/23	8/25	9/25	8/24	6/23	6/25, 9/25			8	195	63	0.323077
ascr#10 5.0 fmol
S6 Figure
ascr#10 100 fmol	3/10							6/24			8/24	6/25				4	83	23	0.277108
ascr#10 1000 fmol	3/10							5/25			9/25					3	60	17	0.283333
ascr#3 2.0 fmol					9/25	6/25			7/24	8/25, 5/25						5	124	35	0.282258
ascr#3 100.0 fmol									9/22	9/24, 9/22		9/25				4	93	36	0.387097

## Sheet: Figure 3A
	Expt. 1	Expt. 2	Expt. 3		# of trials	# of worms	# recovered	fraction recovered
	2014-06-04	2014-12-04	2014-12-26
Figure 3A
C. briggsae male scent		12/23	13/25		2	48	25	0.520833
C. remanei male scent	12/25	15/25			2	50	27	0.54
C. brenneri male scent	15/23	13/25			2	48	28	0.583333

## Sheet: Figure 7 and supplements
	Expt. 1	Expt. 2	Expt. 3	Expt. 4	Expt. 5	Expt. 6		# of trials	# of worms	# recovered	fraction recovered
	2014-09-11	2014-10-01	2015-07-29	2015-08-11	2015-08-15	2015-08-24
Figure 7
daf-7(e1372)	9/25	6/25						2	50	15	0.3
raised 16C to 20C
daf-7(e1372)	6/25	7/25						2	50	13	0.26
raised 16C to 20C
plus male scent
daf-7(e1372)					27/50	13/25		2	75	40	0.533333
gpa-4p::daf-7
raised 16C to 20C
daf-7(e1372)	18/25	14/25			26/49	13/25		4	124	71	0.572581
gpa-4p::daf-7
raised 16C to 20C
plus male scent
S10 Figure
EG4883 control					15/50			1	50	15	0.3
EG4883 ascaroside control					14/45			1	45	14	0.311111
EG4883 male cocktail					30/45			1	45	30	0.666667
S11 Figure
daf-7(e1372)			21/50	24/50				2	100	45	0.45
gpa-4p::daf-7
raised at 20C
daf-7(e1372)			20/50	24/48				2	98	44	0.44898
gpa-4p::daf-7
raised at 20C
plus male scent
N2						10/25		1	25	10	0.4
raised 16C to 20C
N2						14/23		1	23	14	0.608696
raised 16C to 20C
plus male scent

## Sheet: S10 Figure
					# of trials	# of worms	# recovered	fraction recovered
S10 Figure
EG4883 control		15/50			1	50	15	0.3
EG4883 ascaroside control		14/45			1	45	14	0.31
EG4883 male cocktail		30/45			1	45	30	0.67
