# Supplementary material for: Sex Pheromones of C. elegans Males Prime the Female Reproductive System and Ameliorate the Effects of Heat Stress
Source: PLoS Genet. 2015 Dec 8;11(12):e1005729. doi: 10.1371/journal.pgen.1005729 (PMC4672928; doi:10.1371/journal.pgen.1005729)
Supplement: S2 Table — (XLSX) [file pgen.1005729.s014.xlsx]

## Sheet: Sheet1
S2 Table. Summary of experiments and numbers of animals tested in this study (brood size, sperm guidance, and related data).
	Number of trials	Number of worms
Figure 3B (C. remanei 10-minute matings)
control	4	29
male-scented	4	32
Figure 4A (Brood size at 20C)
control	1	24
male-scented	1	24
Figure 4B (Brood size after 29C heat stress)
control	7	45
male-scented	12	160
S7 Figure (Brood size after 29C heat stress)
control	4	25
male and hermaphrodite	3	47
male-scented	12	160
hermaphrodite-scented	2	15
daf-22 male-scented	2	13
acox-1 hermaphrodite-scented	2	29
S8 Figure (Timeline of recovery)
control	4	25
male-scented	12	160
S9 Figure (Census of oocytes and embryos at 29C)
control	1	60
male-scented	1	60
Figure 5D (Sperm guidance after 29C)
control	2	30
male-scented	2	36
Figure 5H (Sperm guidance at 20C)
control	1	12
male-scented	1	12
Figure 6A (Sperm guidance after 29C)
control	2	48
male cocktail	2	35
hermaphrodite cocktail	2	35
ascr#10	2	39
ascr#3	2	44
Figure 6B (Fraction of hermaphrodites with concretions)
control	1	50
ascr#10	1	50
ascr#3	1	50
