# Supplementary material for: Sex Pheromones of C. elegans Males Prime the Female Reproductive System and Ameliorate the Effects of Heat Stress
Source: PLOS journal article supplement (doi:10.1371/journal.pgen.1005729), 2015-12-08
Supplement: S9 (10.1371/journal.pgen.1005729.s009) [file journal.pgen.1005729.s009]

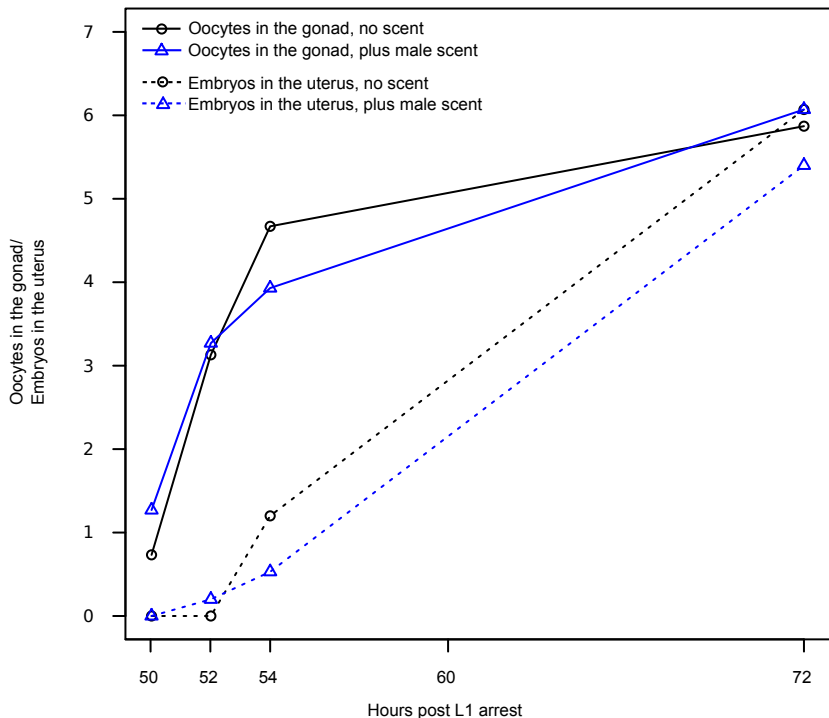

**S9 Fig. Census of oocytes in the proximal gonad and embryos in the uterus for worms shifted to 29°C at 48 hours post L1 arrest on unscented or male-scented plates. See S2 Table for numbers of independent trials and worms tested in each trial.**
